# Supplementary material for: Nutritional Quality and Degree of Processing of Children’s Foods Assessment on the French Market
Source: Nutrients. 2021 Dec 30;14(1):171. doi: 10.3390/nu14010171 (PMC8747148; doi:10.3390/nu14010171)
Supplement: Supplementary file 1 [file nutrients-14-00171-s001.zip › Supplemental Figure S1, Tables S1 and S2.pdf]

## Supplementary Materials

**Figure S1.** Distribution of food groups in the sample ( $n = 1\,155$  ; 23 food groups) according to the NOVA classification

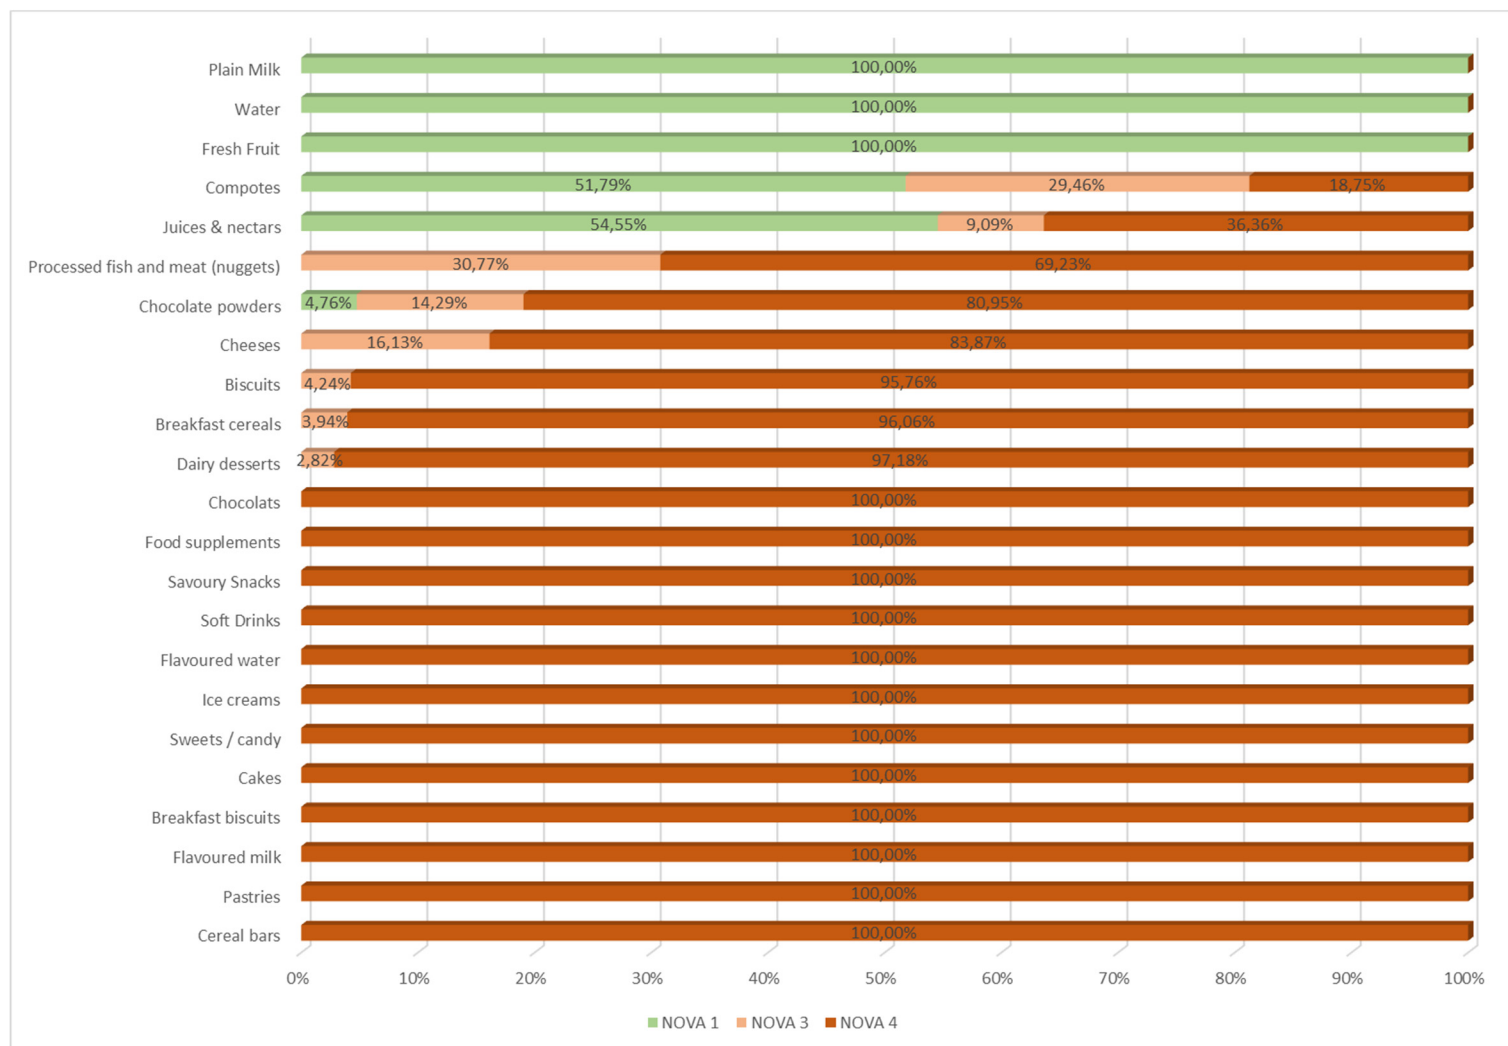

## Supplementary Materials

**Table S1.** Product breakdown by category and store type ( $n = 1\,155$ )

| Categories                        | General     |        | Super & Hypermarkets |        | Hard Discount (HD) |        | Super & Hypermarkets + HD |        | Organic Food stores |        |
|-----------------------------------|-------------|--------|----------------------|--------|--------------------|--------|---------------------------|--------|---------------------|--------|
| Sweets / Candy                    | 189         | 16.48% | 150                  | 20.75% | 33                 | 15.42% | 183                       | 17.85% | 6                   | 4.62%  |
| Biscuits                          | 165         | 14.39% | 101                  | 13.97% | 41                 | 19.16% | 142                       | 13.85% | 23                  | 17.69% |
| Dairy desserts                    | 142         | 12.38% | 109                  | 15.08% | 28                 | 13.08% | 137                       | 13.37% | 5                   | 3.85%  |
| Breakfast cereals                 | 127         | 11.07% | 71                   | 9.82%  | 25                 | 11.68% | 96                        | 9.37%  | 31                  | 23.85% |
| Compotes                          | 112         | 9.76%  | 56                   | 7.75%  | 20                 | 9.35%  | 76                        | 7.41%  | 36                  | 27.69% |
| Cakes                             | 98          | 8.54%  | 80                   | 11.07% | 12                 | 5.61%  | 92                        | 8.98%  | 6                   | 4.62%  |
| Pastries                          | 60          | 5.23%  | 51                   | 7.05%  | 9                  | 4.21%  | 60                        | 5.85%  | 0                   | 0.00%  |
| Soft Drinks                       | 49          | 4.27%  | 43                   | 5.95%  | 6                  | 2.80%  | 49                        | 4.78%  | 0                   | 0.00%  |
| Ice creams                        | 44          | 3.84%  | 40                   | 5.53%  | 4                  | 1.87%  | 44                        | 4.29%  | 0                   | 0.00%  |
| Cheeses                           | 31          | 2.70%  | 20                   | 2.77%  | 11                 | 5.14%  | 31                        | 3.02%  | 0                   | 0.00%  |
| Chocolates                        | 24          | 2.09%  | 10                   | 1.38%  | 8                  | 3.74%  | 18                        | 1.76%  | 6                   | 4.62%  |
| Juices & nectars                  | 22          | 1.92%  | 16                   | 2.21%  | 0                  | 0.00%  | 16                        | 1.56%  | 6                   | 4.62%  |
| Chocolate powders                 | 21          | 1.83%  | 13                   | 1.80%  | 3                  | 1.40%  | 16                        | 1.56%  | 5                   | 3.85%  |
| Savoury Snacks                    | 20          | 1.74%  | 15                   | 2.07%  | 5                  | 2.34%  | 20                        | 1.95%  | 0                   | 0.00%  |
| Processed fish and meat (nuggets) | 13          | 1.13%  | 8                    | 1.11%  | 4                  | 1.87%  | 12                        | 1.17%  | 1                   | 0.77%  |
| Flavoured milk                    | 12          | 1.05%  | 11                   | 1.52%  | 1                  | 0.47%  | 12                        | 1.17%  | 0                   | 0.00%  |
| Cereal bars                       | 11          | 0.96%  | 6                    | 0.83%  | 4                  | 1.87%  | 10                        | 0.98%  | 1                   | 0.77%  |
| Flavoured water                   | 5           | 0.44%  | 5                    | 0.69%  | 0                  | 0.00%  | 5                         | 0.49%  | 0                   | 0.00%  |
| Food supplements                  | 3           | 0.26%  | 0                    | 0.00%  | 0                  | 0.00%  | 0                         | 0.00%  | 3                   | 2.31%  |
| Water                             | 3           | 0.26%  | 3                    | 0.41%  | 0                  | 0.00%  | 3                         | 0.29%  | 0                   | 0.00%  |
| Breakfast biscuits                | 2           | 0.17%  | 2                    | 0.28%  | 0                  | 0.00%  | 2                         | 0.20%  | 0                   | 0.00%  |
| Milk                              | 1           | 0.09%  | 0                    | 0.00%  | 0                  | 0.00%  | 0                         | 0.00%  | 1                   | 0.77%  |
| Fresh fruit                       | 1           | 0.09%  | 1                    | 0.14%  | 0                  | 0.00%  | 1                         | 0.10%  | 0                   | 0.00%  |
| <b>TOTAL</b>                      | <b>1155</b> |        | <b>811</b>           |        | <b>214</b>         |        | <b>1025</b>               |        | <b>130</b>          |        |

## Supplementary Materials

**Table S2.** Distribution of food groups in the sample ( $n = 22$ ) according to the Nutri-Score labelling system

|                                   | Nutri-Score A | Nutri-Score B | Nutri-Score C | Nutri-Score D | Nutri-Score E |
|-----------------------------------|---------------|---------------|---------------|---------------|---------------|
| Sweets / Candy                    | 0 (0.00%)     | 2 (1.06%)     | 6 (3.17%)     | 162 (85.71%)  | 19 (10.05%)   |
| Biscuits                          | 0 (0.00%)     | 0 (0.00%)     | 2 (1.21%)     | 60 (36.36%)   | 103 (62.42%)  |
| Dairy desserts                    | 1 (0.70%)     | 98 (69.01%)   | 41 (28.87%)   | 2 (1.41%)     | 0 (0.00%)     |
| Breakfast cereals                 | 17 (13.39%)   | 25 (19.69%)   | 60 (47.24%)   | 25 (19.69%)   | 0 (0.00%)     |
| Compotes                          | 111 (99.11%)  | 1 (0.89%)     | 0 (0.00%)     | 0 (0.00%)     | 0 (0.00%)     |
| Cakes                             | 0 (0.00%)     | 0 (0.00%)     | 11 (11.22%)   | 76 (77.55%)   | 11 (11.22%)   |
| Pastries                          | 0 (0.00%)     | 0 (0.00%)     | 8 (13.33%)    | 24 (40.00%)   | 28 (46.67%)   |
| Soft Drinks                       | 0 (0.00%)     | 0 (0.00%)     | 5 (10.20%)    | 20 (40.82%)   | 24 (48.98%)   |
| Ice creams                        | 0 (0.00%)     | 0 (0.00%)     | 32 (72.73%)   | 11 (25.00%)   | 1 (2.27%)     |
| Cheeses                           | 0 (0.00%)     | 0 (0.00%)     | 0 (0.00%)     | 31 (100.00%)  | 0 (0.00%)     |
| Chocolates                        | 0 (0.00%)     | 0 (0.00%)     | 0 (0.00%)     | 2 (8.33%)     | 22 (91.67%)   |
| Juices & nectars                  | 0 (0.00%)     | 0 (0.00%)     | 13 (59.09%)   | 4 (18.18%)    | 5 (22.73%)    |
| Chocolate powders                 | 0 (0.00%)     | 0 (0.00%)     | 9 (42.86%)    | 8 (38.10%)    | 4 (19.05%)    |
| Savoury Snacks                    | 0 (0.00%)     | 0 (0.00%)     | 2 (10.00%)    | 17 (85.00%)   | 1 (5.00%)     |
| Processed fish and meat (nuggets) | 7 (53.85%)    | 5 (38.46%)    | 1 (7.69%)     | 0 (0.00%)     | 0 (0.00%)     |
| Flavoured milk                    | 0 (0.00%)     | 11 (91.67%)   | 0 (0.00%)     | 0 (0.00%)     | 1 (8.33%)     |
| Cereal bars                       | 0 (0.00%)     | 0 (0.00%)     | 2 (18.18%)    | 5 (45.45%)    | 4 (36.36%)    |
| Flavoured water                   | 0 (0.00%)     | 0 (0.00%)     | 1 (20.00%)    | 4 (80.00%)    | 0 (0.00%)     |
| Water                             | 3 (100.00%)   | 0 (0.00%)     | 0 (0.00%)     | 0 (0.00%)     | 0 (0.00%)     |
| Breakfast biscuits                | 0 (0.00%)     | 0 (0.00%)     | 0 (0.00%)     | 2 (100.00%)   | 0 (0.00%)     |
| Plain Milk                        | 1 (100.00%)   | 0 (0.00%)     | 0 (0.00%)     | 0 (0.00%)     | 0 (0.00%)     |
| Fresh fruit                       | 1 (100.00%)   | 0 (0.00%)     | 0 (0.00%)     | 0 (0.00%)     | 0 (0.00%)     |
| Total                             | 141           | 142           | 193           | 453           | 223           |
